1 *Candidatus (Ca.)* phytoplasma asteris subgroups display distinct disease progression dynamics during the  
2 carrot growing season

3

4 Justin Clements<sup>1</sup>, Benjamin Z. Bradford<sup>2</sup>, Marjorie Garcia<sup>2</sup>, Shannon Piper<sup>2</sup>, Weijie Huang<sup>3</sup>, Agnieszka  
5 Zwolinska<sup>4</sup>, Kurt Lamour<sup>5</sup>, Saskia Hogenhout<sup>3</sup> and Russell L. Groves<sup>2\*</sup>

6

7 <sup>1</sup> Department of Entomology, Plant Pathology, and Nematology, University of Idaho, Parma, ID 83660

8 <sup>2</sup> Department of Entomology, University of Wisconsin-Madison, Madison, WI 53706

9 <sup>3</sup> Department of Crop Genetics, John Innes Centre, Norwich, NR4 7UH, UK

10 <sup>4</sup> Department of Virology and Bacteriology, National Research Institute, Poznan, PL

11 <sup>5</sup> Department of Entomology and Plant Pathology, University of Tennessee, Knoxville, TN

12

13 \*Corresponding author

14 Email: groves@entomology.wisc.edu

15 **Abstract**

16

17 Aster Yellows phytoplasma (AYp; *Candidatus (Ca.) Phytoplasma asteris*) is an obligate bacterial pathogen  
18 that is the causative agent of multiple diseases in herbaceous plants. While this phytoplasma has been  
19 examined in depth for its disease characteristics, knowledge about the spatial and temporal dynamics of  
20 pathogen spread is lacking. The phytoplasma is found in plant's phloem and is vectored by leafhoppers  
21 (Cicadellidae: Hemiptera), including the aster leafhopper, *Macrostelus quadrilineatus* Forbes. The aster  
22 leafhopper is a migratory insect pest that overwinters in the southern United States, and historical data  
23 suggest these insects migrate from southern overwintering locations to northern latitudes annually,  
24 transmitting and driving phytoplasma infection rates as they migrate. A more in-depth understanding of  
25 the spatial, temporal and genetic determinants of Aster Yellows disease progress will lead to better  
26 integrated pest management strategies for Aster Yellows disease control. Carrot, *Daucus carota* L., plots  
27 were established at two planting densities in central Wisconsin and monitored during the 2018 growing  
28 season for Aster Yellows disease progression. Symptomatic carrots were sampled and assayed for the  
29 presence of the Aster Yellows phytoplasma. Aster Yellows disease progression was determined to be  
30 significantly associated with calendar date, crop density, location within the field, and phytoplasma  
31 subgroup.

## 32 Introduction

33 Understanding the progression of pathogen infections resulting in disease phenotypes in  
34 agricultural crops is critically important for determining effective pest management strategies. Aster  
35 Yellows phytoplasma (AYp), *Candidatus* (*Ca.*) *Phytoplasma asteris* is one agricultural pathogen of  
36 concern, particularly for commercial growers of carrot, lettuce and celery in the Midwest. This small,  
37 wall-less prokaryote can infect more than 350 different species of plants including vital agricultural crops  
38 resulting in multiple host-dependent disease phenotypes [1-3]. In carrot, the AYp pathogen causes Aster  
39 Yellows (AY) disease, which is characterized by stunted growth, bittering of the root, and premature  
40 plant death. This pathogen is vectored by multiple leafhopper species [1-3]. However, in the central  
41 United States, the primary vector of concern is the aster leafhopper (ALH), *Macrosteles quadrilineatus*  
42 Forbes (Hemiptera: Cicadellidae), which enables the movement of the phytoplasma from infected hosts  
43 into susceptible healthy plants. ALH is a migratory insect, overwintering in the southern United States  
44 [3]. Historically, the migration of ALH from the southern United States into northern, agriculturally-  
45 intensive areas is thought to drive infection rates (number of AYp infected leafhoppers/ total number of  
46 leafhoppers collected) [1].

47 Understanding and reducing the spread of pathogenic agents in the field is of critical importance  
48 for agricultural growers. The movement of AYp across larger, geographic areas has previously been  
49 examined in depth [1-3]. However, the progression and movement of AYp genotypes within individual  
50 commercial agricultural fields has not been explored. Previous studies have examined different disease  
51 models, and determined several factors influencing the movement of pathogens within different plant  
52 species [4-7]. These include insect sensory mechanisms [7], pathogen-protein manipulation of host  
53 plants [8], the movement of pathogens within the host plant [4], and geographic and temporal  
54 components [3,9]. These results suggest multiple factors are involved in the development of endemic  
55 disease conditions resulting in AY. Characterizing the specific factors, including the arrival and  
56 colonization of carrot fields by the ALH, and the development and spread of the AY disease vectored by  
57 these leafhoppers, would provide growers with additional information useful for managing this  
58 economically important disease.

59 Symptoms of AY disease can vary depending on the infected plant species. In commercial  
60 carrots, *Daucus carota* L., AYp can cause the agriculturally significant disease AY. Symptoms include  
61 witch's broom (proliferation of shoots), phyllody (retrograde development of flowers into leaves),  
62 virescence (flower organs remaining green), bolting, formation of shortened internode and elongated  
63 petioles, chlorosis, and the production of hairy roots [10]. The etiology of Aster Yellows related disease

64 consists of one taxon group of phytoplasma, *Candidatus (Ca.) Phytoplasma asteris*. However, within the  
65 species designation there are multiple subgroups of the phytoplasma [8, 11-12]. The subgroup  
66 classification is based on the phylogenetic difference between a conserved region of the 16S ribosomal  
67 RNA [13]. Within the Midwestern region of the United States, and more specifically Wisconsin, the AYp  
68 subgroups 16Srl-A and 16Srl-B have been detected and are both known causative agents of AY in carrots  
69 [2].

70 In the 16Srl-A AYp strain, secreted AY-WB protein (SAP) effector genes have been identified and  
71 some have been shown to promote phytoplasma virulence and enhanced insect-pathogen and insect-  
72 plant interactions [14-16]. Studies have identified 56 putative SAPs in the AY-WB genome and SAP11  
73 was found to migrate out of the phloem into adjacent tissues, including trichomes, of *A. thaliana* [17].  
74 Secreted AY-WB11 is a known, destabilizing class II TCP transcription factor of *Arabidopsis thaliana*  
75 leading to the induction of shoot branching resembling witch's broom symptoms and leaf crinkling [16,  
76 18-22]. Moreover, SAP11 suppresses jasmonic acid (JA) synthesis and modulates volatile organic  
77 compounds (VOC) originating from glandular trichomes of plants [16,21]. This interaction relies on a  
78 nuclear localization signal in SAP11, which has also been predicted in SAP22, SAP30 and SAP42 [17]. The  
79 function of another effector, SAP54, has also been characterized in depth, and is known to result in  
80 phenotypic changes in leaf-like sepals, fewer and less elongated siliques, loss of floral determinacy, and  
81 other reproductive deficiencies [14]. Secreted AY-WB 54 interacts with type II MADS-domain  
82 transcription factors (MTFs) and the 26S proteasome shuttle factor RAD23 leading to degradation of  
83 MTFs in plants, causing the phyllody phenotype [14]. The SAP54 effector is also responsible for  
84 enhanced colonization by insect vectors on plants [15], a phenotype that is dependent on SAP54  
85 interaction with RAD23 [15]. Tomkins et al. used a multi-layered model to predict the complex  
86 interactions between leafhopper, phytoplasma and plants related to the expression of effector genes  
87 SAP11 and SAP54 and suggested that the effectors contribute to disease spread [6]. The majority of SAP  
88 genes lie in close proximity to each other on apparent pathogenicity islands that resemble conjugative  
89 transposable elements that were named potential mobile units (PMUs) [22-23]. These PMUs are  
90 variably present and horizontally exchanged among phytoplasmas [24]. In the genome of AY-WB  
91 phytoplasma, the gene for SAP11 lies on a PMU-like genomic region adjacent to other candidate  
92 effector genes encoding for SAP56, SAP66, SAP67, SAP68. The genes for 34 of the 56 SAPs are also  
93 located on PMUs, while 7 are located on plasmids [17, 20, 22].

94 In the current investigation, our overarching goal was to investigate the disease progression of  
95 AY within a carrot field, emphasizing the spatial and temporal dynamics of AY incidence and the

96 composition of SAP effectors genes associated with AYp strains found in infected plants. We further  
97 examined the effects of within-field location, time, and planting density on AY incidence and  
98 characterized the genetic markers related to the composition of AYp. We found that the patterns of  
99 disease spread are not random but structured, and are the result of multiple biological parameters. The  
100 findings provide insight into the movement and colonization of AYp in a carrot field and will lead to a  
101 better understanding of disease progression and management.

102

## 103 **Materials and Methods**

### 104 **Data availability**

105 All relevant data are contained within the paper and its supporting information files.

106

### 107 **Ethical statement**

108 This article does not contain studies with any human participants and no specific permits were required  
109 for field collection or experimental treatment of *Macrosteles quadrilineatus* for the study described.

110

### 111 **Disease progression and leafhopper pressure**

112 On May 7, 2018, carrot plantings (cv. 'Canada') were established at the University of Wisconsin's  
113 Hancock Agricultural Research Station (HARS) in field K3 (44.118181°N, -89.549045°W). Seed was  
114 purchased through a commercial vendor (Seedway LLC) which conducts phytosanitary procedures  
115 necessary to screen for pathogens and was certified disease free. Within a larger, 180m by 45m carrot  
116 field, a central 66m wide section was divided in half and planted at either a high density (1360k seeds  
117 per hectare) or low density (556k per hectare) seeding rate. Each planting was further divided into five  
118 rows of 18 beds with 4m bare alleys separating rows (90 beds per density). Each 3-row raised bed  
119 measured 2m wide by 6m long. The first and last rows of beds were considered "edge" beds and were  
120 bordered by other, non-carrot crops to the north (sorghum) and the south (green bean). Carrot beds  
121 were subsequently managed with a standard fertilizer program, but no crop protection pesticides  
122 (herbicides, fungicides, insecticides) were applied at any point in the season. Weeds were managed by  
123 hand-pulling every two weeks.

124 Using a random number generator, two beds from each row of the high- and low- density  
125 plantings were selected as plots for biweekly stand counts and AY disease monitoring. Initial counts

126 occurred on Jun 27, 2018, when plots were staked, stand counts of all carrots within selected beds were  
127 conducted, and AY disease phenotype of each carrot observed. Possible AY disease phenotypes included  
128 proliferation of shoots (“witches broom”), retrograde development of flowers into leaves, virescence,  
129 formation of shortened internode and elongated leaves, and yellowing/reddening of foliage. Plots were  
130 scouted in this way every two weeks (Jun 27, Jul 11 and 25, Aug 8 and 21, Sep 6 and 18, Oct 2 and 16)  
131 for a total of 9 observations. The exact location of each phenotypically-described, diseased carrot was  
132 recorded and marked within the field relative to the front stake of each row. Each symptomatic carrot  
133 had a small sample of both petiole and stem removed for genetic confirmation of the presence of the  
134 AYp pathogen in the carrot tissue. Symptomatic carrots were tagged with a small plastic stake to  
135 prevent double-counting over successive sample dates.

136 To assess ALH abundance and infection prevalence within the leafhoppers within the carrot  
137 fields, 1000 sweeps of the plant canopy were performed in both the high- and low-density plantings  
138 using a standard, 15-inch sweep net during each biweekly disease monitoring event. Collected insects  
139 were bagged in 3.8 L sealable plastic bags and placed on ice for transportation to the University of  
140 Wisconsin-Madison for processing, where the total number of ALH was determined and a subset of  
141 individuals (N=40) obtained from each planting density/sample time were stored for later analysis. A  
142 taxonomic key to the family Cicadellidae was used to confirm the identity of all adult ALH [25].

143

## 144 **DNA isolation from plant and leafhopper tissue**

145 Tissue samples from all symptomatic carrots and 40 leafhoppers per density/sample time were  
146 analyzed. Tissue samples (10 mg) collected from carrots were processed as individual samples based  
147 upon tissue type (petiole, stem). Samples were placed in corresponding 1.5 ml sterile microcentrifuge  
148 tubes and homogenized with a sterile plastic pestle in 500  $\mu$ l 2% CTAB (Cetyl-trimethyl-ammonium-  
149 bromide) (bioWORLD, Dublin, OH) buffer with 1  $\mu$ l of 0.2ng/ $\mu$ l RNase A (Thermo Fisher Scientific,  
150 Waltham, MA). Homogenates were incubated at 60°C for 30 min, centrifuged at 12,000g for 5 minutes,  
151 and the supernatant was transferred to a fresh tube. A single volume of chloroform was added and the  
152 samples were gently mixed for 10 minutes. Samples were then centrifuged for 10 minutes at 12,000g  
153 and the supernatant was again transferred to a fresh tube. DNA was precipitated by adding 1 volume of  
154 cold isopropanol and mixed by inversion for 10 minutes. Samples were centrifuged to pelletize DNA and  
155 washed with 75% EtOH. After washing, EtOH was discarded and samples were allowed to completely air  
156 dry; methodology was adapted from Marzachi *et al.* [26]. DNA was suspended in DNase/ RNase free H<sub>2</sub>O,  
157 and subsequently quantified using a NanoDrop, microvolume spectrophotometer (Thermo Fisher

158 Scientific, Waltham, MA), and brought to a final volume of between 20  $\mu$ l -100  $\mu$ l depending on the  
159 measured concentration. Samples were then frozen at -20°C for further analysis.

160

## 161 **Confirmation of Aster Yellows phytoplasma within tissue samples**

162 To confirm the presence of AYp in DNA isolations from tissue samples, a P1/P7 PCR amplification  
163 was conducted, followed by a R16F2n/R16R2 nested PCR on the P1/P7 PCR product to amplify the 16S  
164 rRNA sequence. DNA primers were obtained from Smart *et al.* 1996 (P1/P7) [27] and Gundersen *et al.*  
165 1996 (R16F2n/R16R2) [28] and are presented in **Supplementary Table S1**. Specifically, 25  $\mu$ l PCR  
166 reactions were conducted with GoTaq® Green Master Mix (Promega Corporation, Madison, WI).  
167 Reaction conditions included 240 seconds at 94°C as the initial denaturing step, followed by 30 cycles of  
168 30 seconds at 94°C for denaturation, 60 seconds at 64°C (P1/P7) or 60°C (R16F2n/R16R2) for annealing,  
169 90 seconds at 72°C for extension and a final extension of 300 seconds at 72°C. PCR amplification  
170 products were run on a 1.5% agarose gel to confirm the presence of corresponding DNA fragments. The  
171 corresponding DNA fragment observed from the P1/P7 amplification was 1.8 kbp, while the nested  
172 product was 1.2 kbp. Total DNA of only extracted carrot tissue through CTAB procedure was used to  
173 analyze the genetic composition of subgroup and effector proportions. Subgroup identification was  
174 determined using both nucleic acid sequencing and restriction fragment length polymorphism (RFLP).  
175 The identity and position of six unique, single nucleic acid polymorphisms (SNPs) were compared  
176 between sequences to identify AYp subgroup. Furthermore, a RFLP assay using the restriction  
177 endonuclease Hha1 (Promega Corporation), was conducted at 37°C for 90 min and run on 1.5% agarose  
178 gel. RFLP was used as a supplementary assay to confirm the subgroup designation resulting from SNP  
179 assessment of the sequencing data [11].

180

## 181 **Effector determination by ‘MonsterPlex’ sequencing**

182 To assess the genetic variability of Aster Yellows phytoplasma approximately 400ng of each AYp-  
183 positive carrot sample’s DNA was submitted to Floodlight Genomics LLC (Knoxville, TN) for ‘MonsterPlex’  
184 amplification and Illumina DNA sequencing. Floodlight Genomics used an optimized Hi-Plex approach to  
185 amplify targets in a single multiplex reaction with 21 targets including 16S rRNA and 20 effector  
186 sequences (**Supplementary table S2**). The sample-specific barcoded amplicons were sequenced on the  
187 Illumina HiSeq X platform according to the manufacturer’s directions. Floodlight Genomics delivered  
188 sample-specific raw DNA sequence reads as FASTQ files. Annotation of the raw reads was performed

189 with Geneious bioinformatics software (Auckland, New Zealand). Raw reads were aligned to reference  
190 sequences and annotated. To determine subgroup designation, the reads were annotated for known  
191 SNPs associated with each subgroup [11]. Effector reads were aligned to reference sequences, and the  
192 total number of effector reads were standardized to the number of 16S rRNA within each sample to  
193 generate a reads ratio indicating the number of reads of each effector per 16S rRNA read. Effectors were  
194 classified as being present in a sample if the read number after standardization was greater than 1.  
195 Effectors SAP21, 36, 54, and 67 did not amplify in either subgroup and were removed from further  
196 analysis, as amplification might have been the result of primer efficiency within the 'MonsterPlex'  
197 analysis. Samples were considered AYp-infected if both the PCR and genetic sequencing were positive  
198 for the presence of the phytoplasma (16S rRNA sequences were searched against the non-redundant  
199 nucleotide NCBI database using BLASTn).

200

## 201 **Data analysis**

202 The effect of date, planting density, and plot location (edge/interior of field) on AY disease  
203 incidence was quantified using a maximum likelihood regression model with a beta binomial distribution  
204 and a logit link function in JMP Pro 13.2.1 (SAS Institute, Cary, NC). Beta binomial models require a total  
205 count and a diseased count variable, both of which were generated for each plot on each scouting date.  
206 Differences in effector copy number by AYp subgroup were analyzed in R version 3.6.1 (R Core Team,  
207 Vienna, Austria) by running a binomial regression with a logit link function for each effector and  
208 performing a Chi-squared test on the resultant model.

## 209 **Results**

### 210 **Edge- and density-dependent disease progression**

211 Aster Yellows disease progression increased over the growing season and was also dependent  
212 upon initial planting density. On the first sampling date (27 Jun 2018), no symptomatic carrots were  
213 identified. Disease incidence gradually increased throughout the season until October, when it increased  
214 exponentially, reaching an average of  $4.5 \pm 1.8\%$  (edge plots) and  $4.3 \pm 1.9\%$  (interior plots) in the high-  
215 density planting, and an average of  $11.0 \pm 5.9\%$  (edge plots) and  $8.2 \pm 2.2\%$  (interior plots) in the low-  
216 density planting (**Figure 1, Supplemental Table S3**).

217



218 **Figure 1.** Mean Aster Yellows disease incidence in carrot plantings by planting density (high/low) and  
219 plot location within the field (edge/interior).

220

221 Aster Yellows disease incidence appeared to be influenced by planting density (high versus low  
222 density), by plot location within the field (field-edge versus interior plots), and was strongly dependent  
223 on date. To evaluate each of these factors, a mixed model was constructed to include *density* (high/low),  
224 *plot location* (edge/interior), and *week number*, and all two-way interactions as fixed effects, and *plot* as  
225 a random effect (**Supplemental Table S4**). In the incidence model, *density* ( $F=9.06$ ,  $P=0.0083$ ), *week*  
226 ( $F=479.49$ ,  $P<0.0001$ ), and the *density\*week* interaction ( $F=26.81$ ,  $P<0.0001$ ) were significant. The  
227 random effect of plot was also significant (Wald's  $p$ -value=0.040), indicating disease incidence  
228 differences between specific plots in the field independent of all other fixed effects. Plot location within  
229 the field showed a non-significant trend ( $F=2.63$ ,  $p=0.12$ ). This model confirms a significant difference in  
230 disease incidence between the high-density and low-density plantings, as well as a difference in the rate  
231 of change in disease progress between the two densities. However, a similar mixed model using only the  
232 number of diseased carrots per plot rather than the stand count-adjusted disease incidence values only,  
233 showed week as a significant component ( $f=497.82$ ,  $p<.0001$ ), with density, location, and all interaction  
234 terms non-significant. This suggests that the progression of AY through both the high- and low-density  
235 plantings was not limited by the number of available host plants, but rather by other factors.

236

### 237 **Aster leafhopper abundance and infectivity**

238 Cumulative ALH abundance and rates of AYp-carrying ALH peaked in late August of 2018 and  
239 followed a similar bell-shaped distribution over both high and low planting densities. As the principal  
240 insect vector of the AYp in Wisconsin, ALH populations were monitored to evaluate vector pressure  
241 throughout the 2018 growing season in the high- and low-density carrot plots. From each leafhopper  
242 collection, a subset of adult ALH was assayed for phytoplasma to quantify the infectivity of the in-field  
243 leafhopper populations at unique time points throughout the study. Cumulative ALH abundance and  
244 rates of AYp-carrying ALH captured within the two plots peaked in late August of 2018 and followed  
245 similar bell-shaped distributions over both high and low planting densities (**Figure 2**). Aster leafhopper  
246 abundance in the field peaked from late July through late August, with populations declining through  
247 September and October (**Figure 2**). The fraction of captured ALH carrying the AYp followed a similar  
248 pattern, with a mean peak infectivity of 8.75% coincident with peak ALH populations (**Figure 2**).

249

250 **Figure 2.** Mean abundance of aster leafhoppers and proportion of captured leafhoppers infected with  
251 AYp averaging over both planting densities within the carrot field.

252  
253 Aster leafhopper abundance was greater in the high-density carrot plantings in July and August.  
254 Abundance peaked in the high-density planting at 32.85 ALH/ 20 sweeps. Further, phytoplasma-carrying  
255 ALH similarly peaked at 17.5% within the ALH populations in high density plantings on August 21 (**Figure**  
256 **3**). The combination of high ALH counts together with high phytoplasma detections within the ALH  
257 coincide with high AYp disease incidence in carrot fields.

258  
259 **Figure 3.** Abundance of aster leafhoppers and proportion of captured leafhoppers infected with AYp  
260 illustrating both high density (**A**) and low density (**B**) plantings in the carrot field.

261

## 262 **Aster yellows phytoplasma genotypic determination**

263 Aster Yellows disease in carrots predominantly manifested late in the growing season with a  
264 higher proportion of AYp subgroup 16Srl-A (67%). In addition to evaluating carrot plots for disease  
265 progress, tissue samples from each symptomatic carrot (laboratory-confirmed AYp-positive samples)  
266 were genotyped to determine phytoplasma subgroup. In this experiment, only 16Srl-A and 16Srl-B AYp  
267 subgroups were observed within the field, with the overall subgroup composition changing significantly  
268 during the growing season (**Figure 4**). In the early portions of the sampling season, AYp samples were  
269 comprised of only 16Srl-B subgroup whereas a greater proportion of mid-season samples were mixed,  
270 containing varying proportions of both 16Srl-A and 16Srl-B. The majority of AY diseased carrots  
271 possessed overt symptoms late in the growing season, and the greatest proportion of these infected  
272 carrots were classified as AYp subgroup 16Srl-A (67%)

273

274 **Figure 4.** Number of new Aster Yellows phytoplasma infected carrots identified and sampled by date,  
275 illustrating the ratio of both AYp 16Srl-A and 16Srl-B subgroup proportions for each sample date.

276

## 277 **Secreted AY-WB effector identification**

278 The distribution and proportion of SAP effectors depends upon AY subgroup designation. By  
279 employing 'MonsterPlex' parallel PCR amplification techniques, we were able to quantify the abundance  
280 of known effector sequences in the AYp genome and PMUs in 290 unique AYp samples collected from

281 symptomatic carrots. To generate a “read ratio” for each effector, the number of reads per effector was  
282 normalized to the number of 16 rRNA gene reads for each sample. These normalized read values  
283 revealed significant differences in the presence of effectors genes between the two AYp subgroups  
284 observed in the investigation (**Figure 5**). From among the 20 effectors amplified, SAP11, 13, 15, 19, 45,  
285 and 68 were found to be specific to the 16Srl-A subgroup and not detected in the 16Srl-B subgroup  
286 (above an established threshold). Effectors SAP05, 06, 27, 35, 41, 42, 44, 48, 49, and 66 were present in  
287 both subgroups. Of the effectors present in both subgroups, SAP05, 06, 41, 42, and 66 amplifications  
288 generated more than double the amount of reads from samples that were infected with the 16Srl-A  
289 subgroup compared to the 16Srl-B subgroup. Both SAP06 and SAP66 were observed at an average read  
290 number 35.3 and 21.4 times greater, respectively, in the 16Srl-A subgroup compared to the 16Srl-B  
291 subgroup. The effectors with the highest number of reads in subgroup 16Srl-A samples were SAP41  
292 (81.40 reads per 16 rRNA read) and SAP42 (78.34 reads per 16 rRNA read), while SAP48 (62.69 reads per  
293 16 rRNA read) and SAP49 (68.34 reads per 16 rRNA read) had the highest copy within subgroup 16Srl-B  
294 (**Supplemental Table S2**). Only SAP44 generated slightly more reads from 16Srl-B versus 16Srl-A within  
295 infected samples.

296

297 **Figure 5.** A) Effector read number within 16Srl-A and 16Srl-B subgroups. B) Effector ratio between 16Srl-  
298 A and 16Srl-B subgroups. Result of Chi-squared tests of significance comparing 16r RNA-normalized  
299 effector copy numbers shown along top of panel A (\*\*\*\* (P<0.0001), \*\* (P<0.01), NS=non-significant).

300

## 301 **Discussion and Conclusions**

302 The movement and spread of AYp relies on multiple insect vectors, including the ALH [3]. Within  
303 susceptible agricultural crops the disease is monitored by growers and proactively controlled with  
304 insecticides when the vector is deemed in sufficiently high numbers [3]. However, if not controlled  
305 properly, AYp can manifest itself as AY disease, which can have significant ramifications in terms of crop  
306 yield and raw product quality. We sought to understand the progression of this disease in an insecticide-  
307 free environment to determine the ecological factors that influence AY disease progression. We  
308 examined the variables: time, planting density, location within the field (edge versus interior plot  
309 effects) and the associated genetics of the AYp (subgroup designation and effector composition) and  
310 hypothesized that disease progression within carrot fields by AYp was not random. However, we  
311 determined that the progression of AY disease is influenced by more than just the genotypic construct of  
312 AYp; it is also influenced by sample location, planting density and time during the crop season.

313           The overall progression of AY disease was influenced by sample location within field, planting  
314 density, and time of year. We observed that AY disease progressed at higher rates at lower planting  
315 densities. This suggests that infected leafhoppers were perhaps more readily attracted to infected  
316 plants, or that infected plants had greater apparency to mobile insects in less dense aggregations.  
317 Further, plants located along the outside edges of sample plots had a higher likelihood of infection by  
318 AYp, though only a non-significant trend ( $P=0.12$ ). This could suggest that the movement of leafhoppers  
319 is directional and that leafhoppers are colonizing the field from the plot edges and inward. Similar to  
320 other members of the Hemiptera, adult leafhopper host location cues involve contrasts, increasing the  
321 likelihood that landing and initial inoculations may occur along field or plot edges. Leafhoppers were  
322 observed within our field as early as June 21, 2018, with the highest abundance on August 21, 2018. The  
323 highest rates of new infections were observed several weeks after peak leafhopper counts, in mid-  
324 September, which roughly corresponds to the previously described period of latency for development of  
325 visual AY symptoms in newly infected carrots, which can vary from 2-3 weeks [29]. While the observed  
326 infection rates within the low-density carrots were statistically higher than the high-density planting, the  
327 actual, and non-adjusted numbers of carrots infected in the low- and high-density planting were  
328 statistically similar. Although overall ALH numbers and the associated incidence of AYp infection within  
329 the insects was greater in the high-density plantings, the incidence of AYp infection within susceptible  
330 carrots (carrot cultivars that have been evaluated to be susceptible to infection by the AYp, and develop  
331 overt symptoms as a result of AYp infection ) [30] was correspondingly lower, suggesting that the  
332 numbers of potentially inoculative insect vectors may not be limiting disease progress.

333           It has been previously established that AYp consists of multiple, genetically-distinct subgroups  
334 that can cause AY disease in carrots [11]. In Wisconsin there are at least two AYp subgroups, 16Srl-A and  
335 16Srl-B, that are known AY disease agents [2, 11]. These earlier observations correspond to the findings  
336 of this study where we observed 16Srl-A, 16Srl-B, or a coinfection with both subgroups present in our  
337 experimental fields. The predominant subgroup at the beginning of the growing season was represented  
338 by 16Srl-B (100%), however as the season progressed the subgroup composition significantly shifted to  
339 16Srl-A (67%) by the end of the season. The higher proportion of 16Srl-B at the beginning of the season  
340 could be an artifact of the initial low number of infected carrots. However, the shift in subgroup  
341 proportion is important to highlight and suggests that the 16Srl-A subgroup is being selected for in  
342 comparison to the 16Srl-B subgroup within our experiment. We did detect a small fraction of carrots  
343 infected with both 16Srl-A and 16Srl-B, suggesting that the pathogen can co-occur within the same host.

344 Differences in SAP effector genes between the 16Srl-A and 16Srl-B subgroups may contribute to the  
345 higher abundance of 16Srl-A later in the season.

346           Secreted AY-WB effector genes were detected in symptomatic carrots in Wisconsin. Secreted  
347 AY-WB genes were amplified from field-collected plants infected with 16Srl-A phytoplasmas, consistent  
348 with primers designed to the 16Srl-A AY-WB phytoplasma genome. In addition, some effector genes  
349 were present in field-collected 16Srl-B infected plants, indicating that SAPs are present in both the  
350 16Srl-A and 16Srl-B genomes found in Wisconsin. Differences in effector repertoires between the 16Srl-  
351 A and 16Srl-B subgroups could contribute to the distinct disease progression dynamics that are observed  
352 in the fields of Wisconsin. Secreted AY-WB proteins have been documented to manipulate host  
353 presentation to insect vectors. The effectors have been shown to have important biological  
354 ramifications on insect vector colonization (attractiveness) and reproduction (fitness). The exact  
355 function of all effectors investigated is still unknown. However, the functions of SAP11 and SAP54 have  
356 been well documented. Secreted AY-WB protein11 promotes oviposition (egg laying) by gravid, adult  
357 female ALH and SAP54 attracts insect vectors to plants by suppressing innate immune responses to  
358 herbivores. We noted SAP11 effectors were significantly more abundant in 16Srl-A. It is possible that the  
359 SAP11 effector may be more effective at promoting 16Srl-A phytoplasmas when there are more  
360 leafhoppers. However, how SAP11 modulates phytoplasma dynamics in a field situation remains to be  
361 determined. Overall, the effector proportion was significantly skewed towards 16Srl-A. Only SAP44 was  
362 significantly more abundant in the 16Srl-B phytoplasma subgroup. This observation suggests that  
363 subgroup 16Srl-A could be the predominant subgroup found in our field location due to the enhanced  
364 potential for pathogen spread associated with the increased proportion of effectors within this  
365 subgroup.

366           The data presented here represent an evaluation of a select set of factors which may influence  
367 progression of AY disease in susceptible carrots within central Wisconsin. We examined the factors: time  
368 during the growing season, initial planting density, sample location within the field and AYp subgroup  
369 and effector composition. Other factors could be evaluated in future studies to further complement our  
370 current understanding of the AY disease system including temperature, latitude, cultivar and cropping  
371 system. Here we demonstrate that AY disease was greater along plot edges and adjusted, final season  
372 incidence was greater in plots with lower, initial planting density. We also examined the genetic makeup  
373 of the phytoplasma and correlated subgroup 16Srl-A to higher effector proportion and greater disease  
374 spread. This information will lead to a better understanding of AYp movement in commercial crops, and

375 contribute new knowledge towards describing factors that contribute to disease progress in susceptible  
376 carrots.

377

## 378 **Acknowledgements**

379 The authors would like to acknowledge support from the Wisconsin Potato and Vegetable Growers  
380 Association and the associated agricultural community. We would also like to acknowledge Floodlight  
381 Genomics for guidance with their MonsterPlex Technology. We thank the farm staff at the Hancock  
382 Agricultural Research Station for planting and managing the plots throughout the season. This research  
383 was supported by Human Frontiers Science Program grant (HFSP RGP0024/2015) with additional  
384 funding from the Plant Health Institute Strategy Programme (BB/P012574/1) and the John Innes  
385 Foundation.

386

## 387 References

- 388 1) Chiykowski LN, Chapman RK. Migration of the six-spotted leafhopper in central North America. Wis.  
389 Agric. Exp. Stn. Res. Bull. 1965;261:21-45.
- 390 2) Clements J, Garcia M, Bradford B, Crubaugh L, Piper S, Duerr E, Zwolinska A, Hogenhout S, Groves RL.  
391 Genetic Variation Among Geographically Disparate Isolates of Aster Yellow's Phytoplasma in the  
392 Contiguous United States. Journal of economic entomology. 2020 Apr 6;113(2):604-11.
- 393 3) Frost KE, Esker PD, Van Haren R, Kotolski L, Groves RL. Seasonal patterns of aster leafhopper  
394 (Hemiptera: Cicadellidae) abundance and aster yellows phytoplasma infectivity in Wisconsin carrot  
395 fields. Environmental entomology. 2013 Jun 1;42(3):491-502.
- 396 4) Lovell DJ, Parker SR, Hunter T, Royle DJ, Coker RR. Influence of crop growth and structure on the risk  
397 of epidemics by *Mycosphaerella graminicola* (*Septoria tritici*) in winter wheat. Plant pathology. 1997  
398 Feb;46(1):126-38.
- 399 5) Sisterson MS, Stenger DC. Modelling effects of vector acquisition threshold on disease progression in  
400 a perennial crop following deployment of a partially resistant variety. Plant Pathology. 2018  
401 Aug;67(6):1388-400.
- 402 6) Tomkins M, Kliot A, Marée AF, Hogenhout SA. A multi-layered mechanistic modelling approach to  
403 understand how effector genes extend beyond phytoplasma to modulate plant hosts, insect vectors  
404 and the environment. Current opinion in plant biology. 2018 Aug 1;44:39-48.
- 405 7) Werner BJ, Mowry TM, Bosque-Pérez NA, Ding H, Eigenbrode SD. Changes in green peach aphid  
406 responses to Potato leafroll virus-induced volatiles emitted during disease progression.  
407 Environmental entomology. 2009 Oct 1;38(5):1429-38.
- 408 8) Hogenhout SA, Oshima K, Ammar ED, Kakizawa S, Kingdom HN, Namba S. Phytoplasmas: bacteria that  
409 manipulate plants and insects. Molecular plant pathology. 2008 Jul;9(4):403-23.
- 410 9) Hong SC, Magarey R, Borchert DM, Vargas RI, Souder S. Site-specific temporal and spatial validation of  
411 a generic plant pest forecast system with observations of *Bactrocera dorsalis* (oriental fruit fly).  
412 NeoBiota. 2015 Sep 15;27:37.
- 413 10) Rodgers PM, Steveson WR, Wyman JA, Frost K, Groves RL. IPM Perspectives for carrot foliar diseases  
414 in Wisconsin. 2011 <https://learningstore.uwex.edu/Assets/pdfs/A3945.pdf>
- 415 11) Lee IM, Gundersen-Rindal DE, Davis RE, Bottner KD, Marccone C, Seemüller E. 'Candidatus  
416 *Phytoplasma asteris*', a novel phytoplasma taxon associated with aster yellows and related diseases.  
417 International journal of systematic and evolutionary microbiology. 2004 Jul 1;54(4):1037-48.



- 418 12) Yang Y, Jiang L, Tian Q, Lu Y, Zhang X, Zhao W. Detection and identification of a novel subgroup  
419 16SrII-V phytoplasma associated with *Praxelis clematidea* phyllody disease. *International journal of*  
420 *systematic and evolutionary microbiology*. 2017 Dec 1;67(12):5290-5.
- 421 13) Lee IM, Davis RE, Gundersen-Rindal DE. Phytoplasma: phytopathogenic mollicutes. *Annual Reviews*  
422 *in Microbiology*. 2000 Oct;54(1):221-55.
- 423 14) MacLean AM, Orlovskis Z, Kowitzanich K, Zdziarska AM, Angenent GC, Immink RG, Hogenhout SA.  
424 Phytoplasma effector SAP54 hijacks plant reproduction by degrading MADS-box proteins and  
425 promotes insect colonization in a RAD23-dependent manner. *PLoS Biol*. 2014 Apr 8;12(4):e1001835.
- 426 15) Orlovskis Z, Hogenhout SA. A bacterial parasite effector mediates insect vector attraction in host  
427 plants independently of developmental changes. *Frontiers in plant science*. 2016 Jun 23;7:885.
- 428 16) Sugio A, MacLean AM, Grieve VM, Hogenhout SA. Phytoplasma protein effector SAP11 enhances  
429 insect vector reproduction by manipulating plant development and defense hormone biosynthesis.  
430 *Proceedings of the National Academy of Sciences*. 2011 Nov 29;108(48):E1254-63.
- 431 17) Bai X, Correa VR, Toruño TY, Ammar ED, Kamoun S, Hogenhout SA. AY-WB phytoplasma secretes a  
432 protein that targets plant cell nuclei. *Molecular Plant-Microbe Interactions*. 2009 Jan;22(1):18-30.
- 433 18) Chang SH, Tan CM, Wu CT, Lin TH, Jiang SY, Liu RC, Tsai MC, Su LW, Yang JY. Alterations of plant  
434 architecture and phase transition by the phytoplasma virulence factor SAP11. *Journal of*  
435 *experimental botany*. 2018 Nov 26;69(22):5389-401.
- 436 19) Pecher P, Moro G, Canale MC, Capdevielle S, Singh A, MacLean A, Sugio A, Kuo CH, Lopes JR,  
437 Hogenhout SA. Phytoplasma SAP11 effector destabilization of TCP transcription factors differentially  
438 impact development and defence of *Arabidopsis* versus maize. *PLoS pathogens*. 2019 Sep  
439 26;15(9):e1008035.
- 440 20) Sugio A, MacLean AM, Hogenhout SA. The small phytoplasma virulence effector SAP 11 contains  
441 distinct domains required for nuclear targeting and CIN-TCP binding and destabilization. *New*  
442 *Phytologist*. 2014 May;202(3):838-48.
- 443 21) Tan CM, Li CH, Tsao NW, Su LW, Lu YT, Chang SH, Lin YY, Liou JC, Hsieh LC, Yu JZ, Sheue CR.  
444 Phytoplasma SAP11 alters 3-isobutyl-2-methoxypyrazine biosynthesis in *Nicotiana benthamiana* by  
445 suppressing NbOMT1. *Journal of experimental botany*. 2016 Jul 1;67(14):4415-25.
- 446 22) Bai X, Zhang J, Ewing A, Miller SA, Radek AJ, Shevchenko DV, Tsukerman K, Walunas T, Lapidus A,  
447 Campbell JW, Hogenhout SA. Living with genome instability: the adaptation of phytoplasmas to  
448 diverse environments of their insect and plant hosts. *Journal of bacteriology*. 2006 May  
449 15;188(10):3682-96.



- 450 23) Toruño TY, Seruga Musić M, Simi S, Nicolaisen M, Hogenhout SA. Phytoplasma PMU1 exists as linear  
451 chromosomal and circular extrachromosomal elements and has enhanced expression in insect  
452 vectors compared with plant hosts. *Molecular microbiology*. 2010 Sep;77(6):1406-15.
- 453 24) Chung WC, Chen LL, Lo WS, Lin CP, Kuo CH. Comparative analysis of the peanut witches'-broom  
454 phytoplasma genome reveals horizontal transfer of potential mobile units and effectors. *PLoS One*.  
455 2013 Apr 23;8(4):e62770.
- 456 25) Dietrich CH. Keys to the families of Cicadomorpha and subfamilies and tribes of Cicadellidae  
457 (Hemiptera: Auchenorrhyncha). *Florida Entomologist*. 2005 Dec;88(4):502-17.
- 458 26) Marzachi C, Veratti F, Bosco D. Direct PCR detection of phytoplasmas in experimentally infected  
459 insects. *Annals of Applied Biology*. 1998 Aug;133(1):45-54.
- 460 27) Smart CD, Schneider B, Blomquist CL, Guerra LJ, Harrison NA, Ahrens U, Lorenz KH, Seemüller E,  
461 Kirkpatrick BC. Phytoplasma-specific PCR primers based on sequences of the 16S-23S rRNA spacer  
462 region. *Applied and environmental microbiology*. 1996 Aug 1;62(8):2988-93.
- 463 28) Gundersen DE, Lee IM. Ultrasensitive detection of phytoplasmas by nested-PCR assays using two  
464 universal primer pairs. *Phytopathologia mediterranea*. 1996 Dec 1:144-51.
- 465 29) Mahr, S (2015) Aster Yellows. [https://wimastergardener.org/article/aster-](https://wimastergardener.org/article/aster-yellows/#targetText=It%20takes%20another%2010%20days,is%20reduced%20during%20hot%20sp)  
466 [yellows/#targetText=It%20takes%20another%2010%20days,is%20reduced%20during%20hot%20sp](https://wimastergardener.org/article/aster-yellows/#targetText=It%20takes%20another%2010%20days,is%20reduced%20during%20hot%20sp)  
467 [ells](https://wimastergardener.org/article/aster-yellows/#targetText=It%20takes%20another%2010%20days,is%20reduced%20during%20hot%20sp). Accessed October 23rd, 2019.
- 468 30) Gabelman WH, Goldman IL, Breitbach DN. Field evaluation and selection for resistance to aster  
469 yellows in carrot (*Daucus carota* L.). *Journal of the American Society for Horticultural Science*. 1994  
470 Nov 1;119(6):1293-7.
- 471

472 **Supplemental material**

473 **Supplemental Table S1:** Primers

474 **Supplemental Table S2:** Effector abundance by subgroup

475 **Supplemental Table S3:** Carrot stand counts

476 **Supplemental Table S4:** Disease progression mixed model results

## Mean Aster Yellows disease incidence in carrot plots

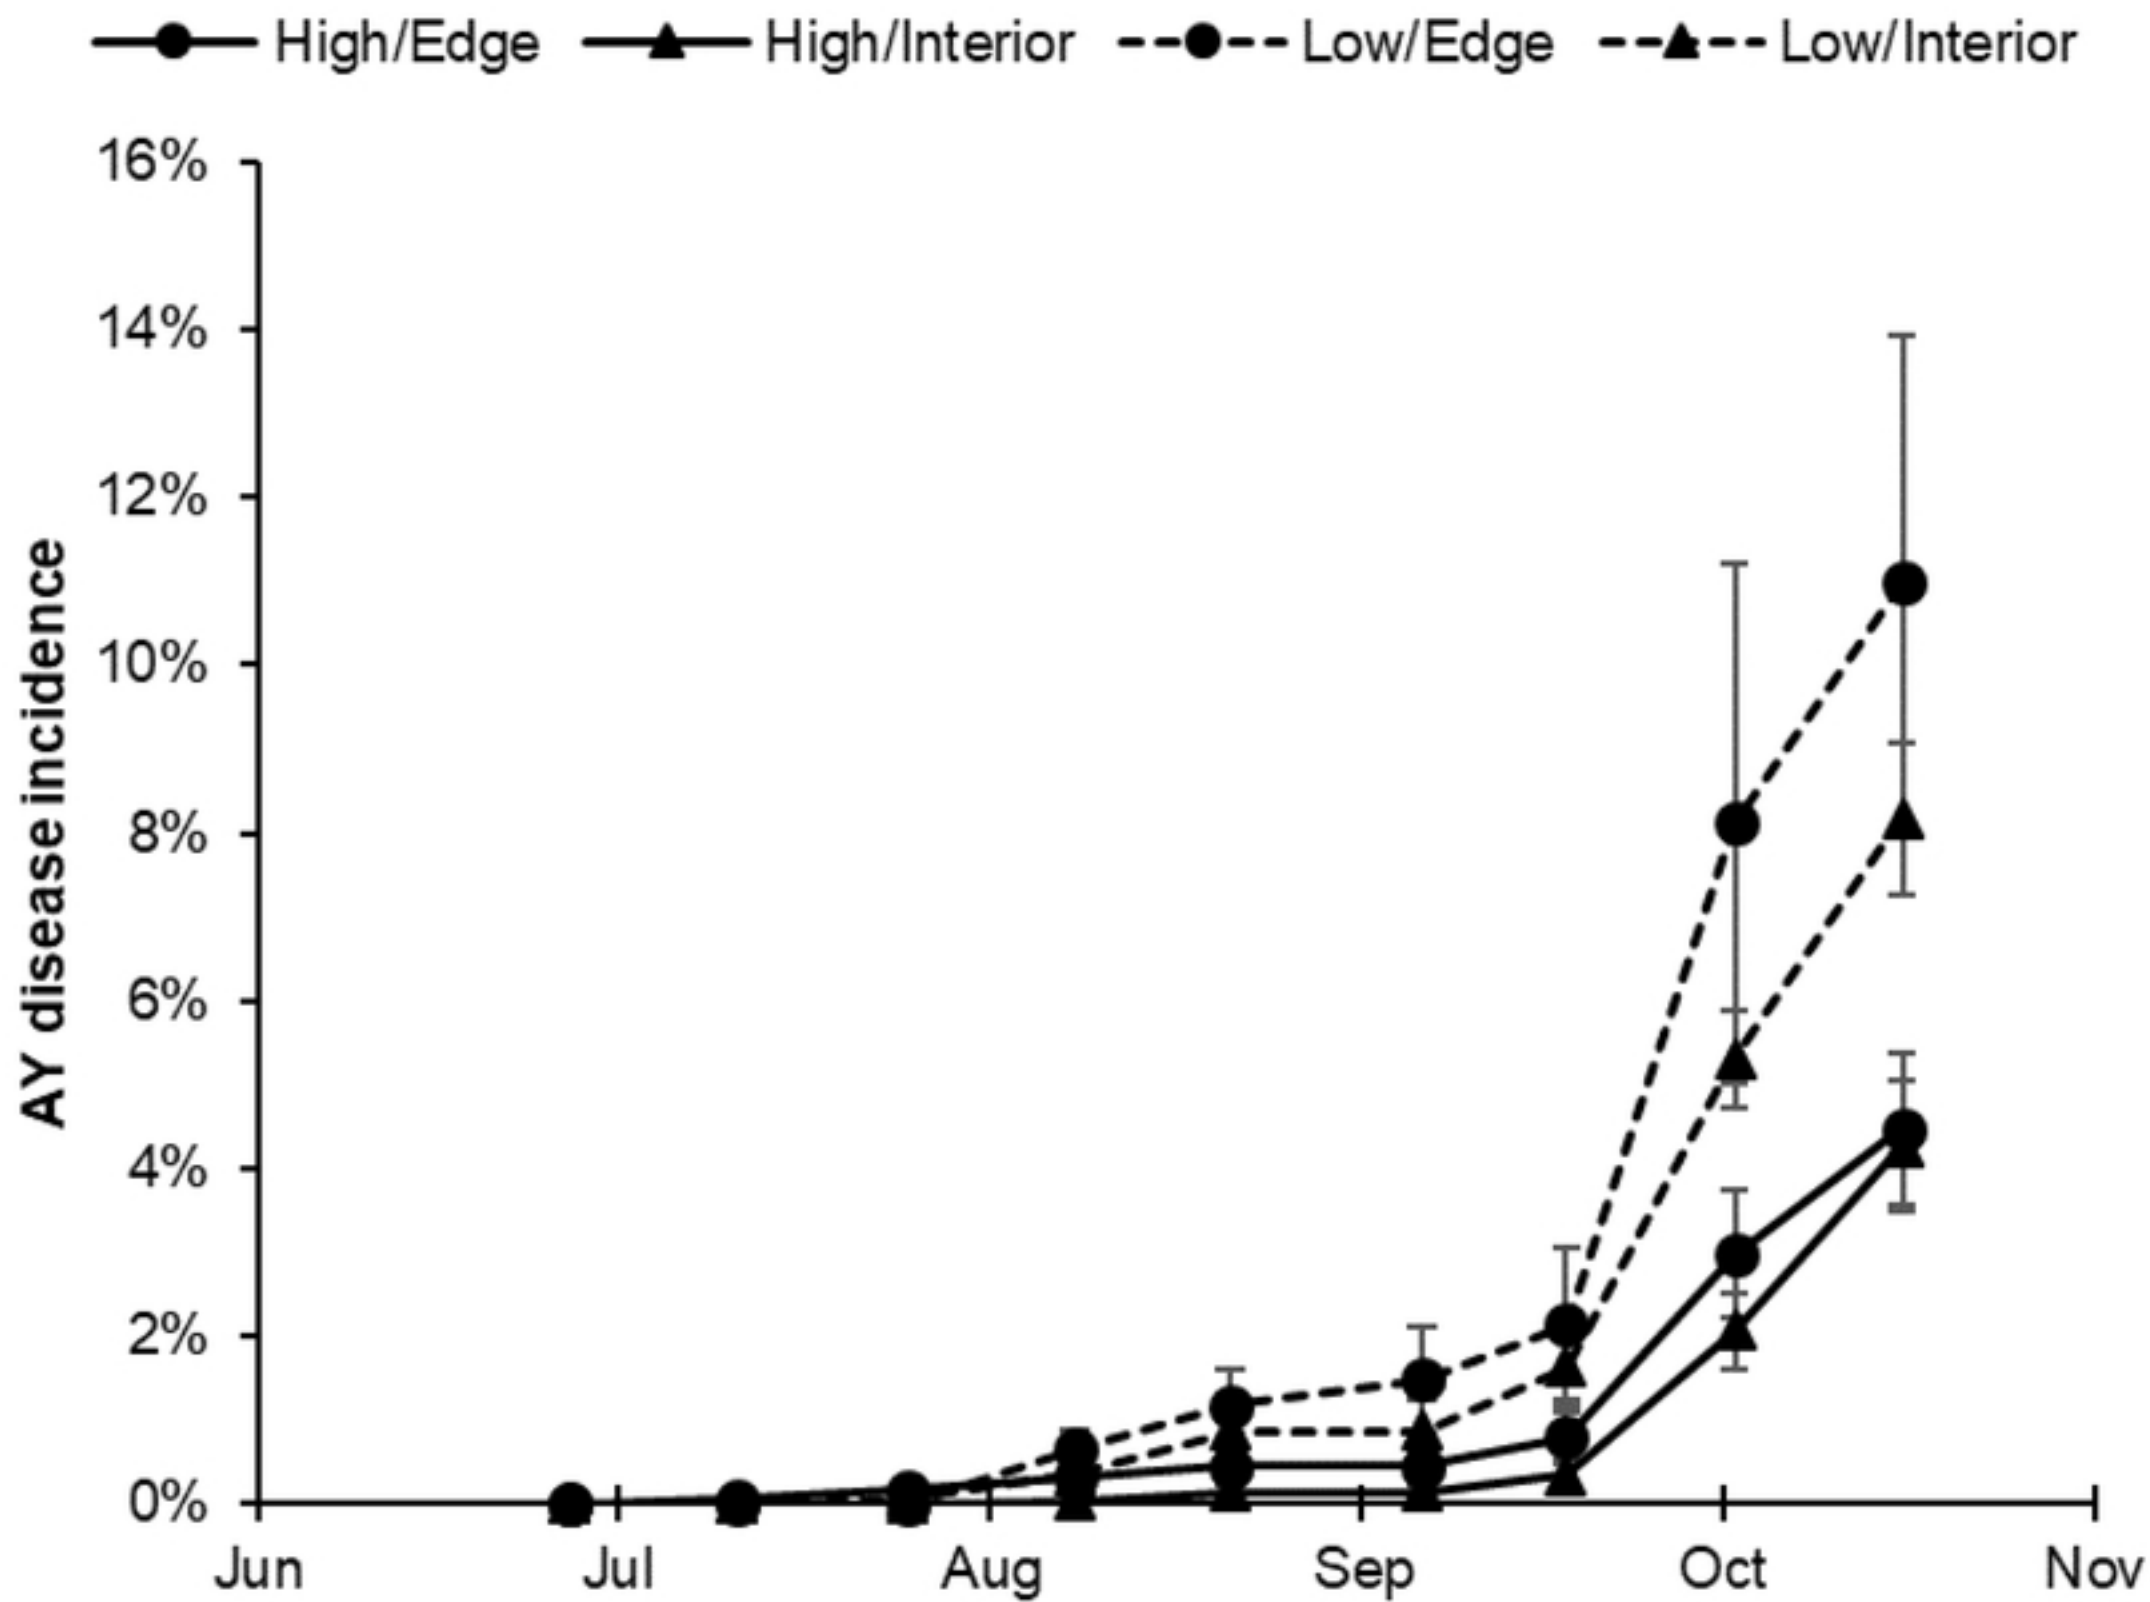

Figure 1

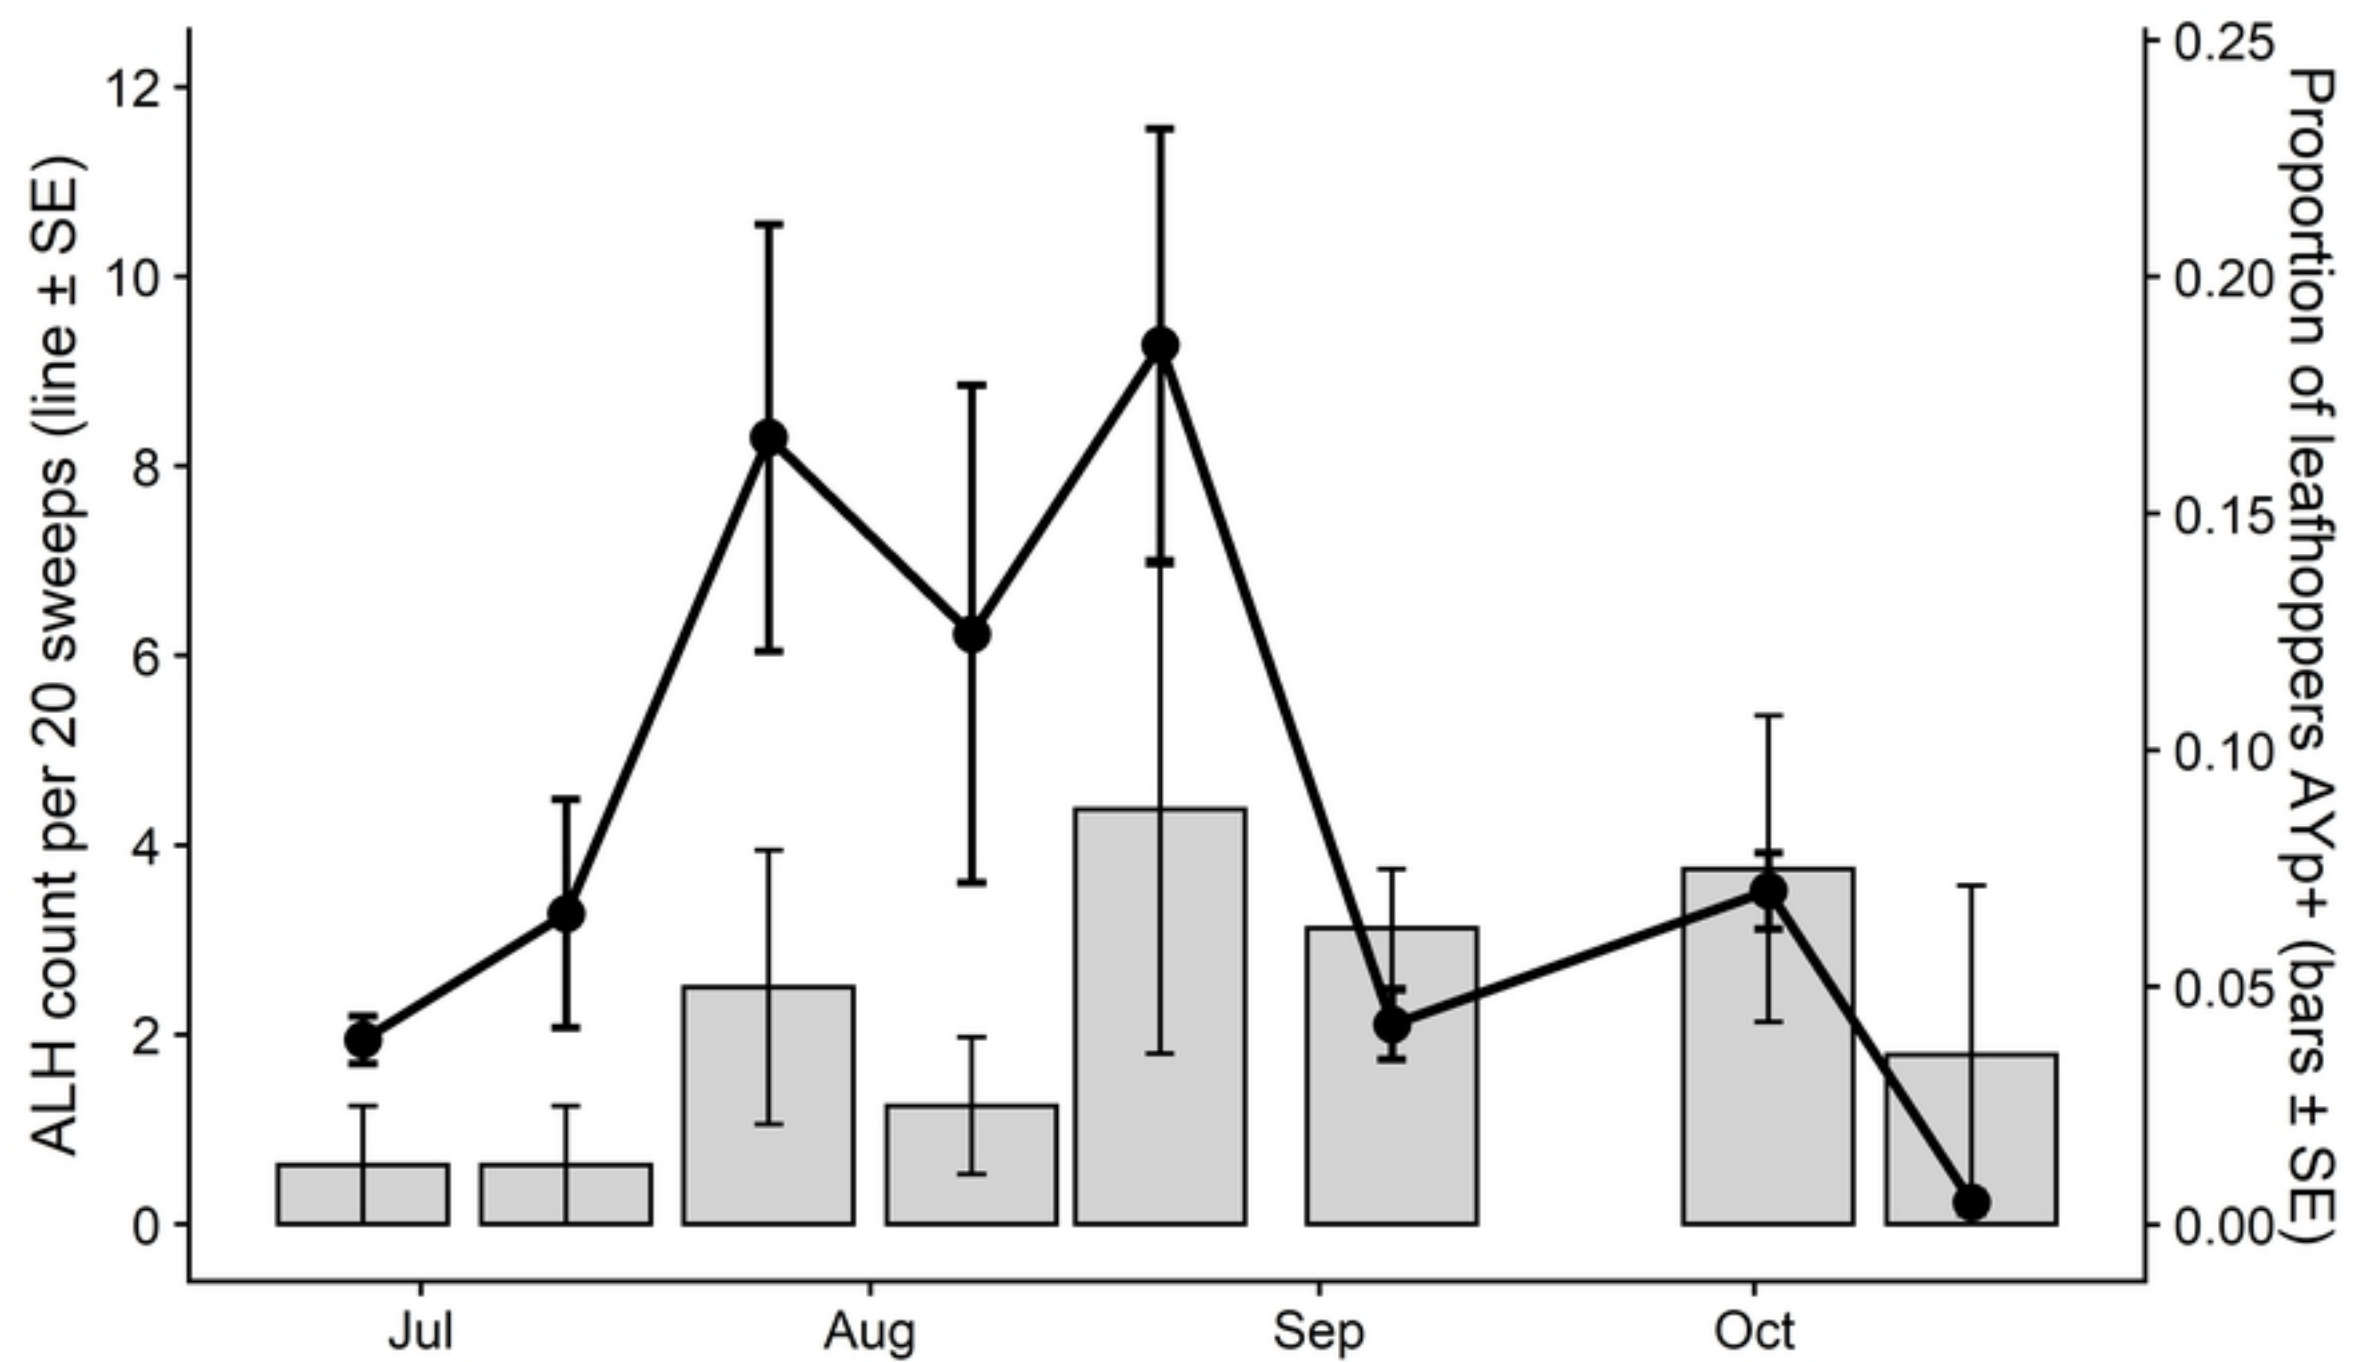

Figure 2

**A. High density planting**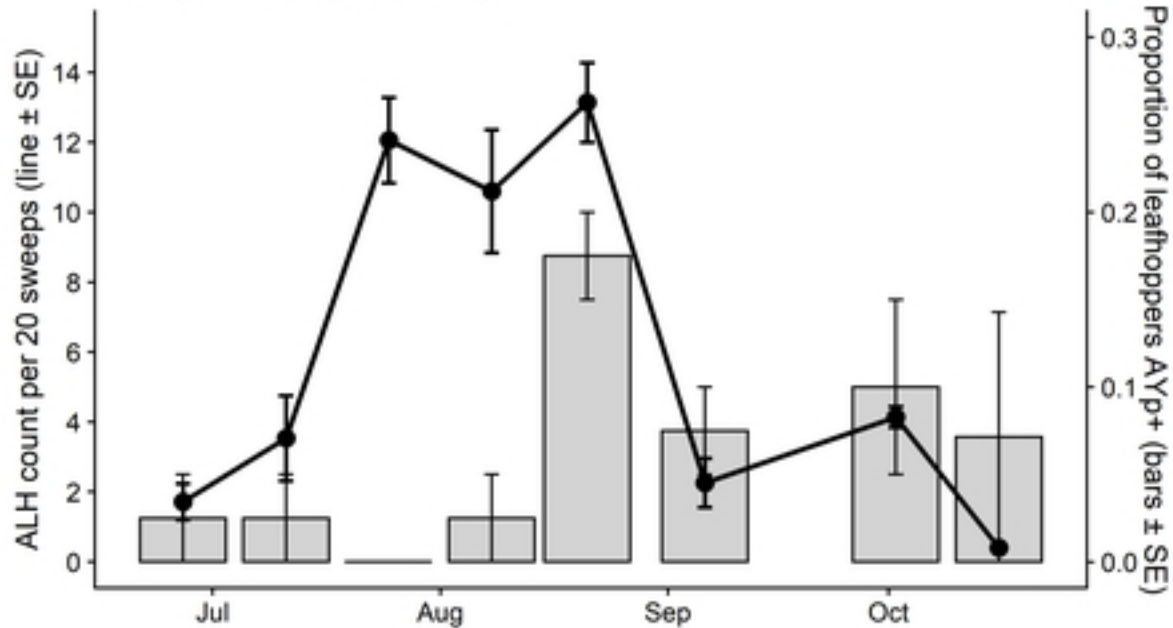**B. Low density planting**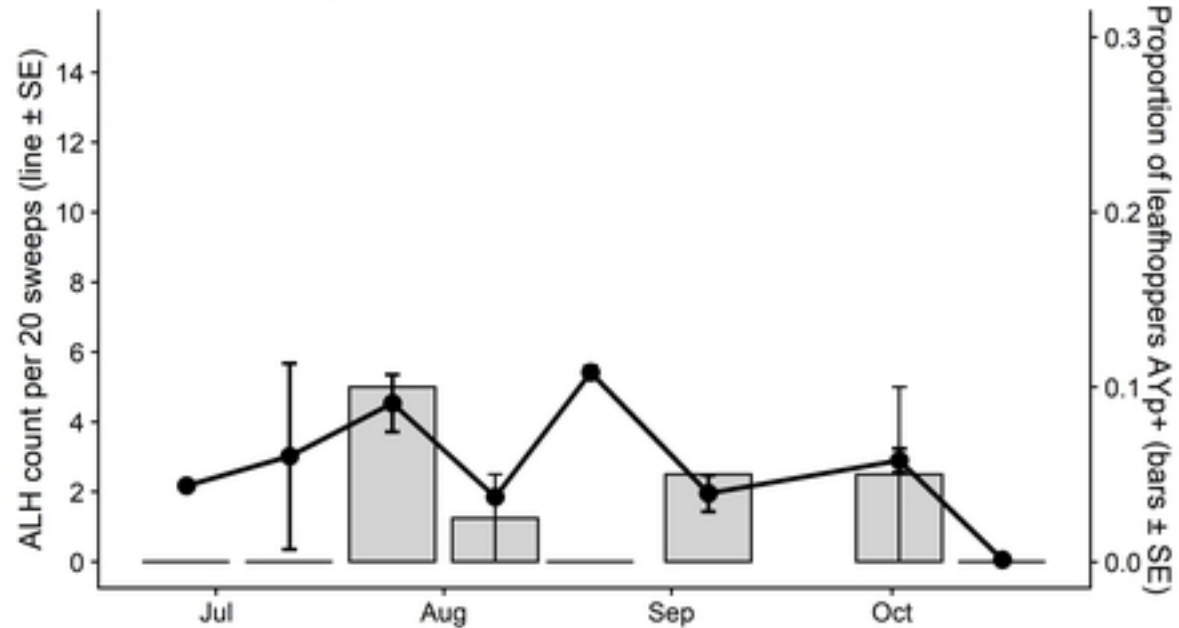**Figure 3**

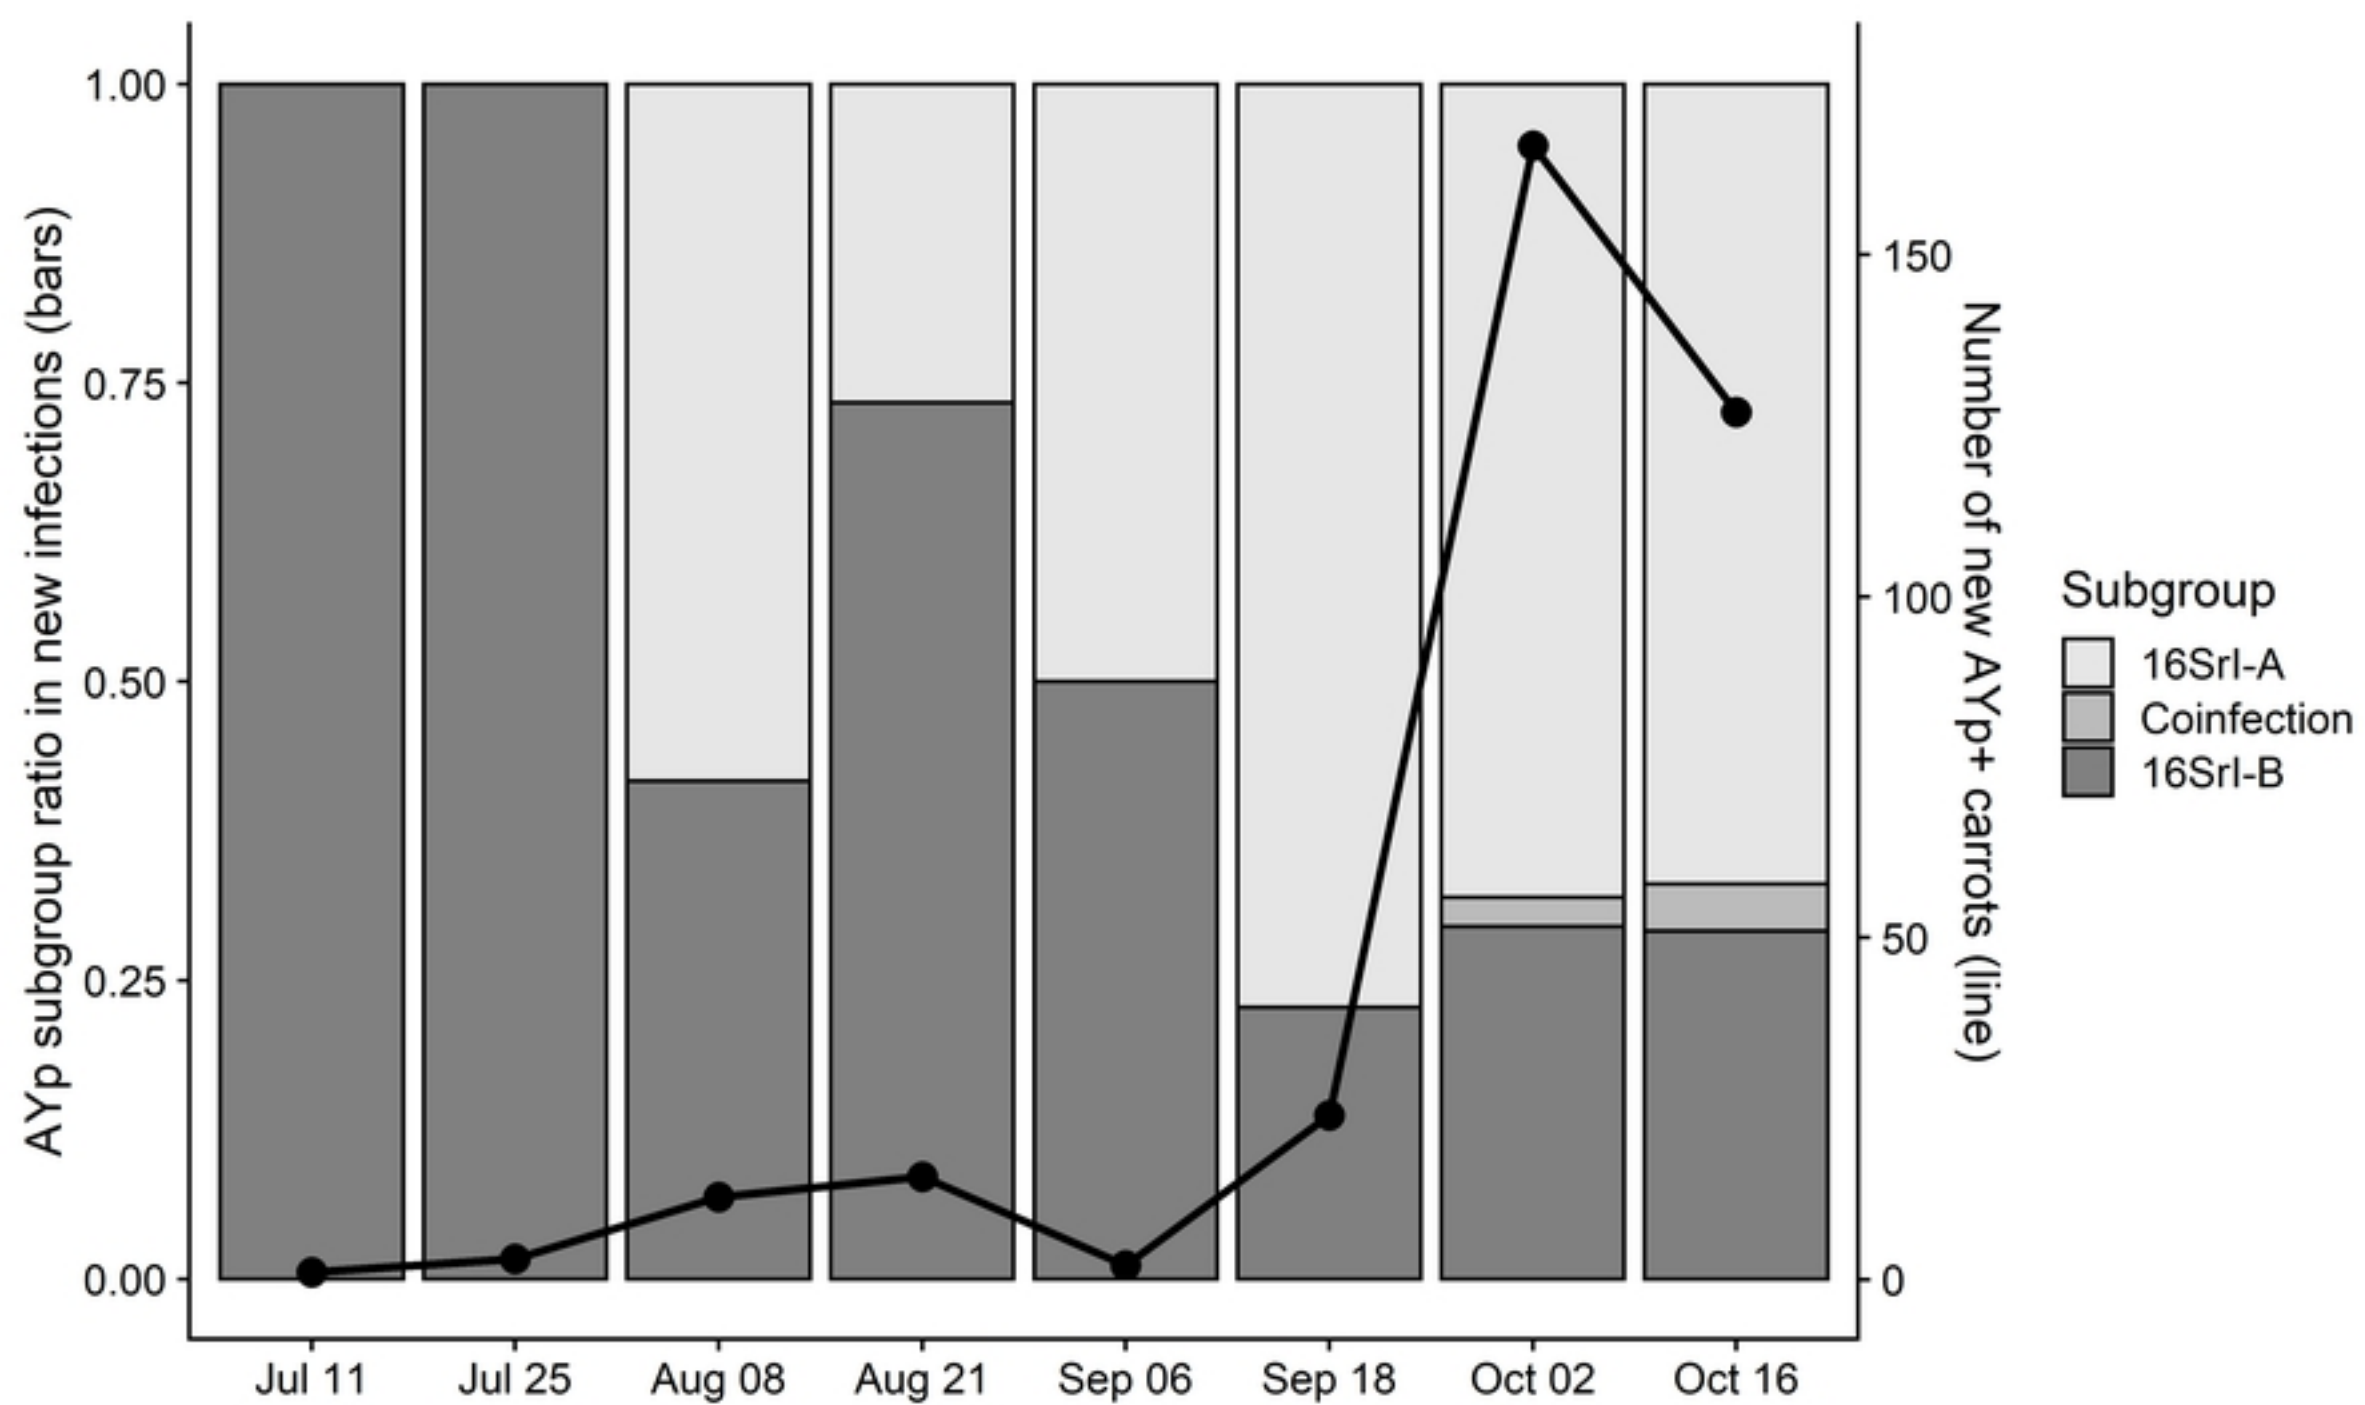

Figure 4

### A. Effector abundance by subgroup

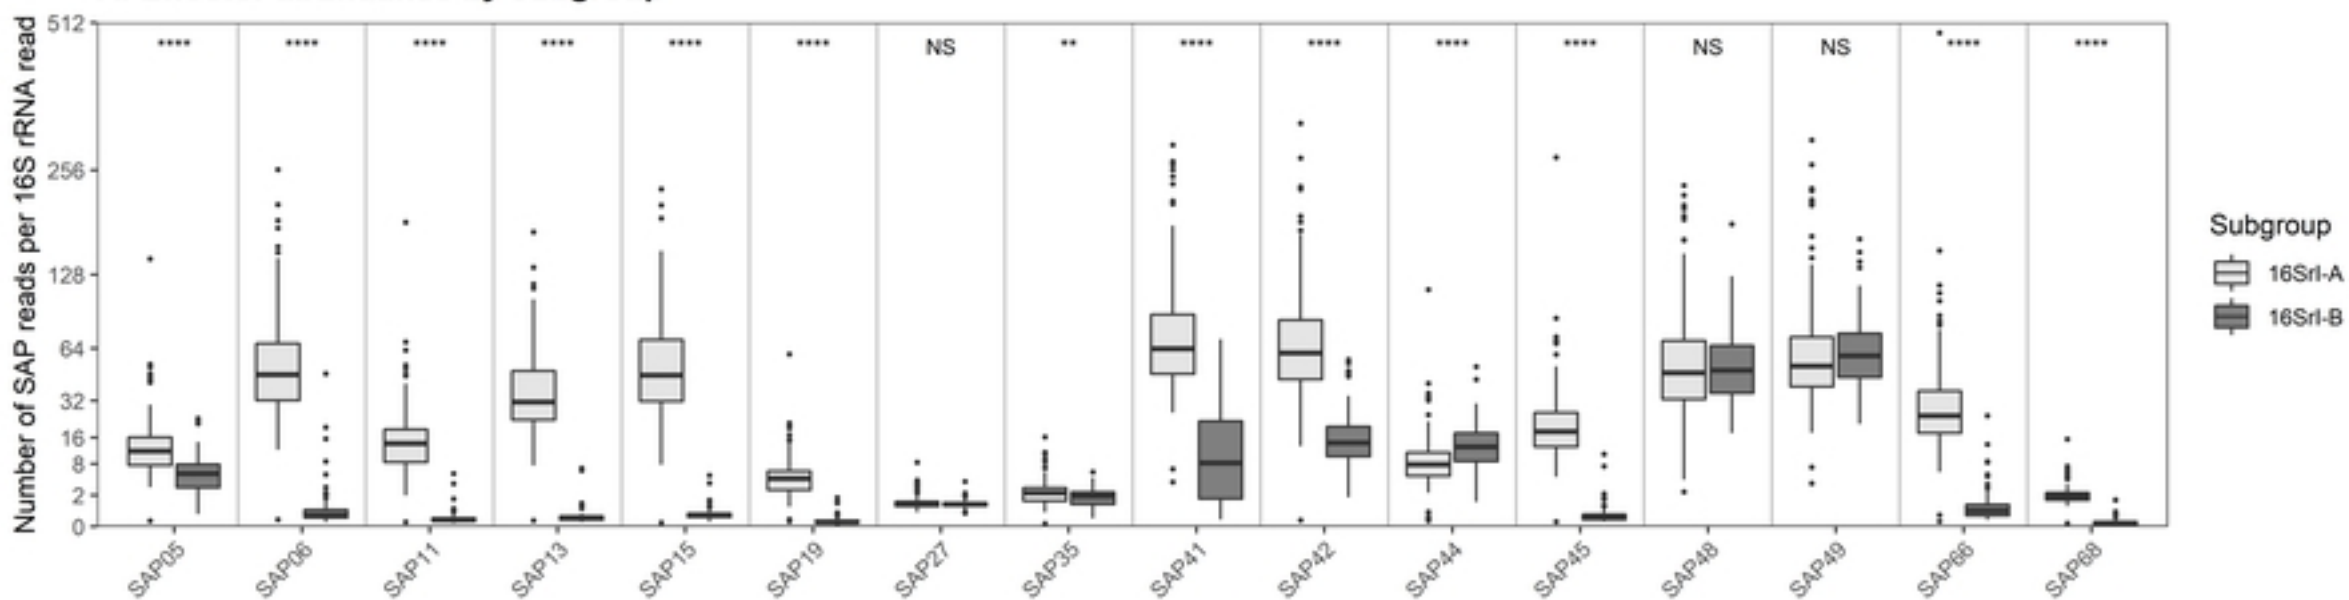

### B. Ratio of effector mean copy number by subgroup

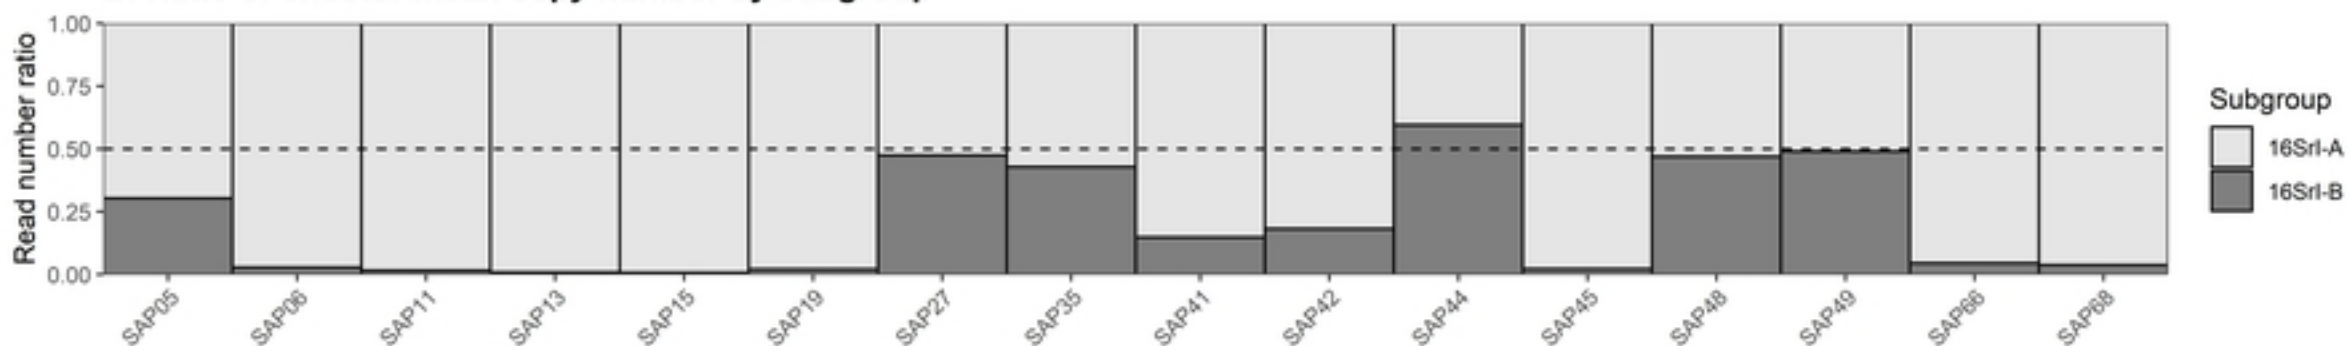

Figure 5
